# Supplementary material
Source: Springer Nature journal article supplement (https://www.springermedizin.de/resource/supplementary/13024_2012_359_MOESM7_ESM.pdf/9643808)

**A**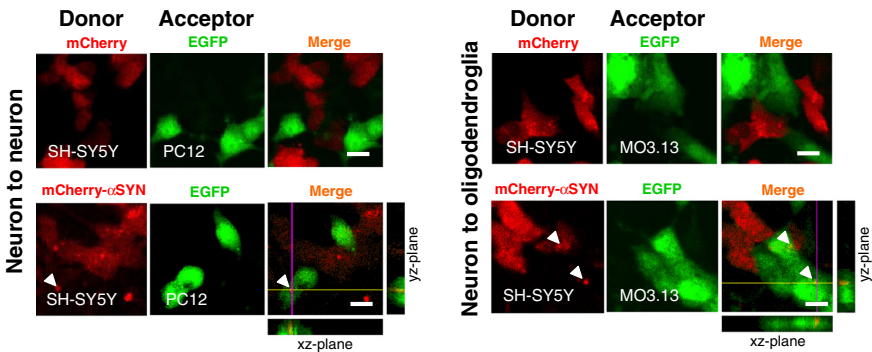**B**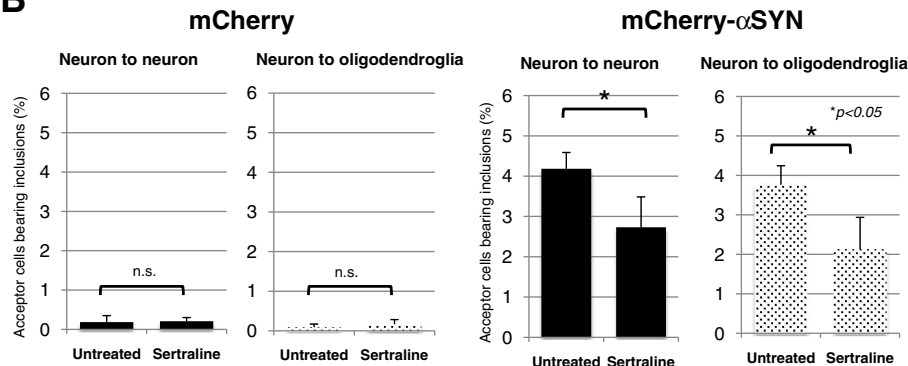**C**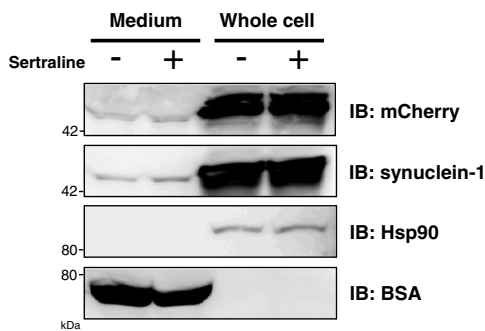

Supplement: MOESM7 [file 9643808]
